# Supplementary material for: Neuroprotective Effect of Valproic Acid on Salicylate-Induced Tinnitus
Source: MDPI journal article supplement (doi:10.3390/ijms23010023), 2021-12-21
Supplement: s1 [file s1]

Supplementary materials

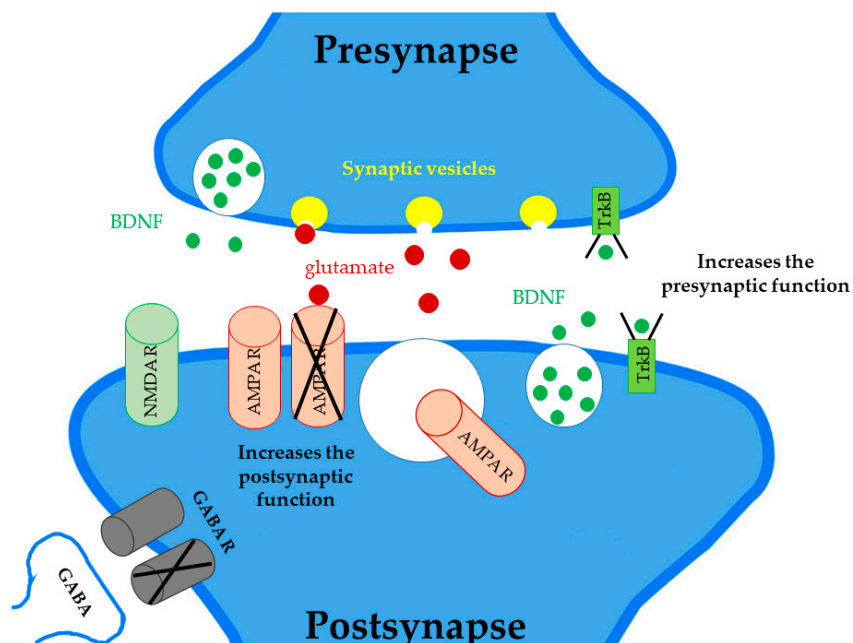

Figure S1. Shows the molecular mechanism behind the influence of salicylate treatment on GABA.

Table S1. Oligonucleotides sequences used for the quantitative polymerase chain reaction.

| Gene                 | Forward primer (5'→3')     | Reverse primer (3'→5')     | Gene accession |
|----------------------|----------------------------|----------------------------|----------------|
| Human $\beta$ -actin | ATC CGC AAA GAC CTG TAC GC | TCT TCA TTG TGC TGG GTG CC | NM_001101      |
| Human NMDA(NR2B)     | GGAGAGGTGGTCATGAAGAG       | CATTGCTGCGTGACACCATG       | NM_000834.4    |
| Human TNF $\alpha$   | GTTGTAGCAAACCCTCAAGCTG     | CCAGCTGGTTATCTCTCAGCTC     | NM_000594.3    |
| Human ARC            | ACAACAGGTCTCAAGGTTCCC      | AGCCGACTCCTCTCTGTAGC       | NM_015193.4    |
| Rat GAPDH            | CTGCCACTCAGAAGACTGTGG      | TTCAGCTCTGGGATGACCTTG      | NM_017008.4    |
| Rat NMDA (NR2B)      | GGAGATGGAAGAACTGGAAGCTC    | GACACCTGCCATATTGTCGATG     | NM_012574.1    |
| Rat TNF $\alpha$     | CCACCACGCTCTTCTGTCTAC      | GATGATCTGAGTGTGAGGGTCTG    | NM_012675.3    |
| Rat ARC              | GTCTGCTGCATAGAAGGAACCAG    | AGGGTGCCCAACACATACTGA      | NM_019361.1    |
